# Supplementary material for: Characterization and Study on Fragmentation Pathways of a Novel Nerve Agent, ‘Novichok (A234)’, in Aqueous Solution by Liquid Chromatography–Tandem Mass Spectrometry
Source: Molecules. 2021 Feb 18;26(4):1059. doi: 10.3390/molecules26041059 (PMC7923011; doi:10.3390/molecules26041059)
Supplement: Supplementary file 1 [file molecules-26-01059-s001.pdf]

Supplementary Materials

# Characterization and Study on Fragmentation pathways of a Novel Nerve Agent, 'Novichok (A234)', in Aqueous Solution by Liquid Chromatography-Tandem Mass Spectrometry

Jin Young Lee <sup>1,\*</sup>, Kyoung Chan Lim <sup>1</sup> and Hyun Suk Kim <sup>1</sup>

Affiliation Agency for Defense Development (ADD), P.O. Box 35-5, Yuseong-gu, Daejeon 305-600, Korea; marlntime@add.re.kr

\* Correspondence: marlntime@add.re.kr; Tel.: +82-42-821-0483, Fax: +82-42-823-3400

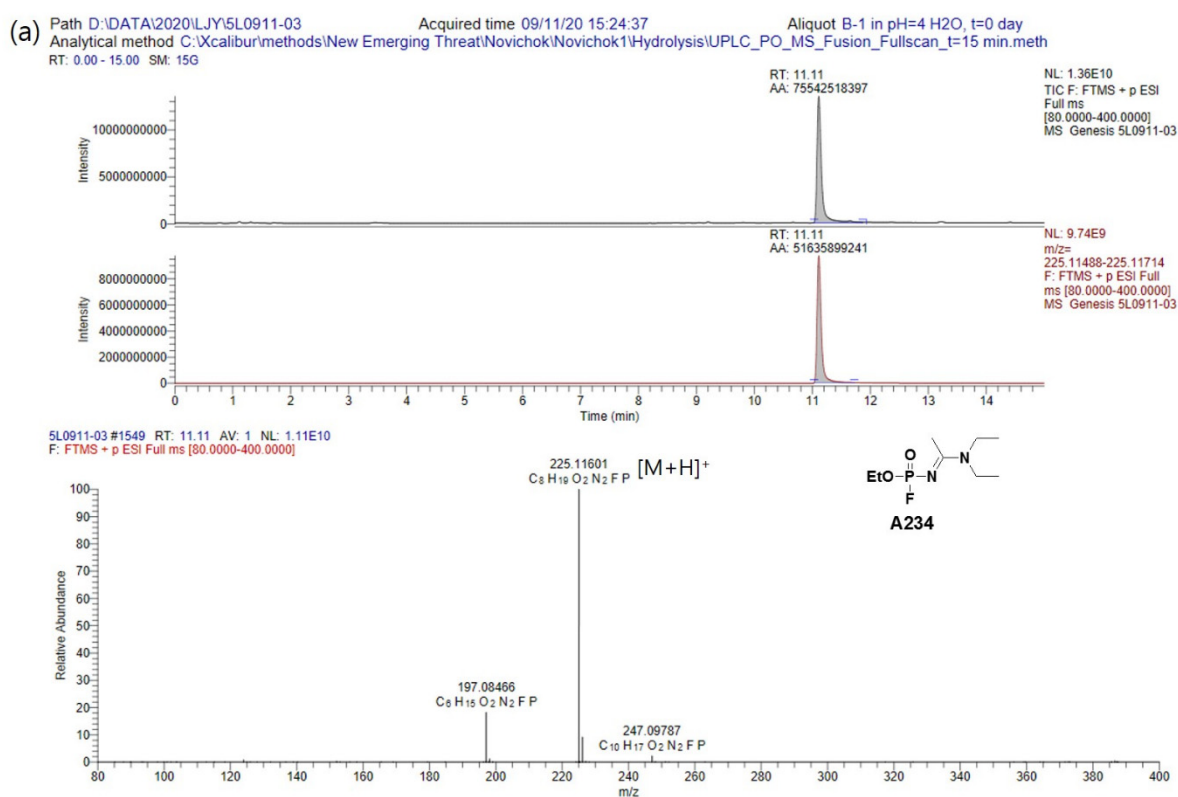

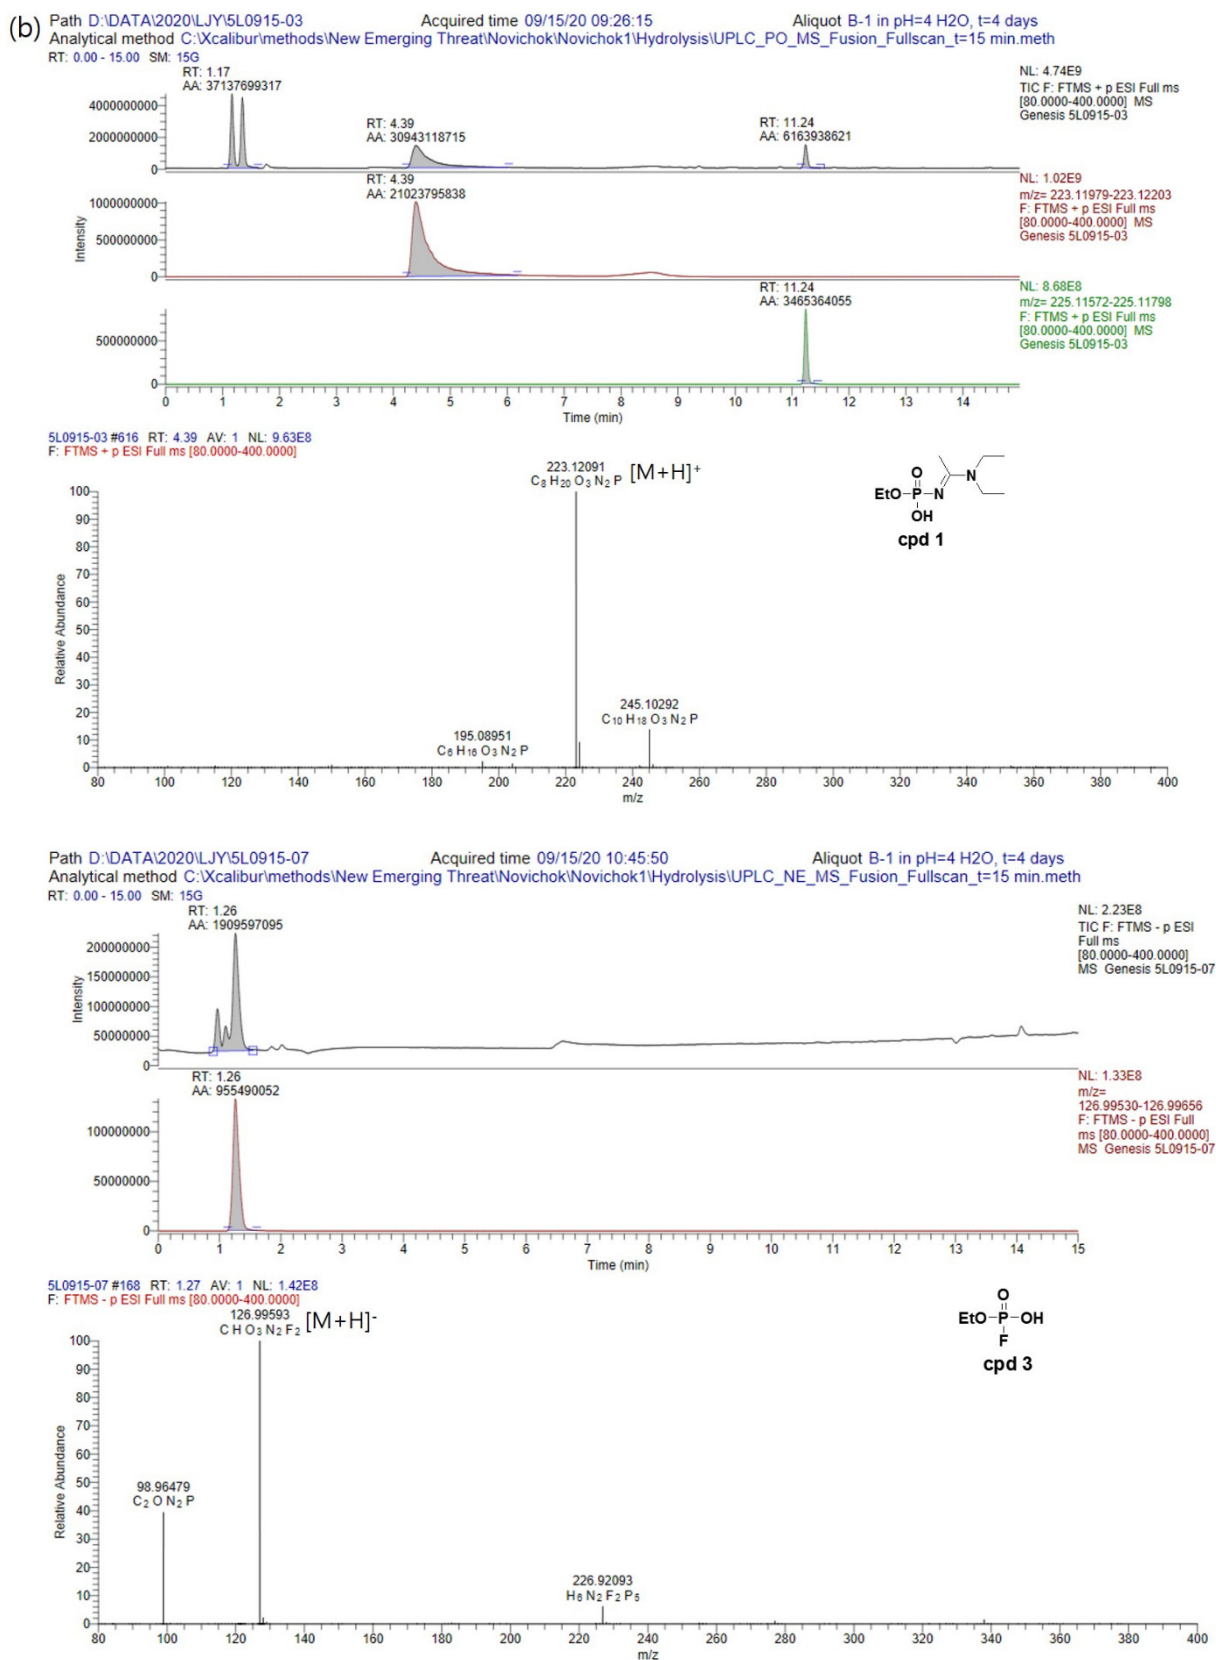

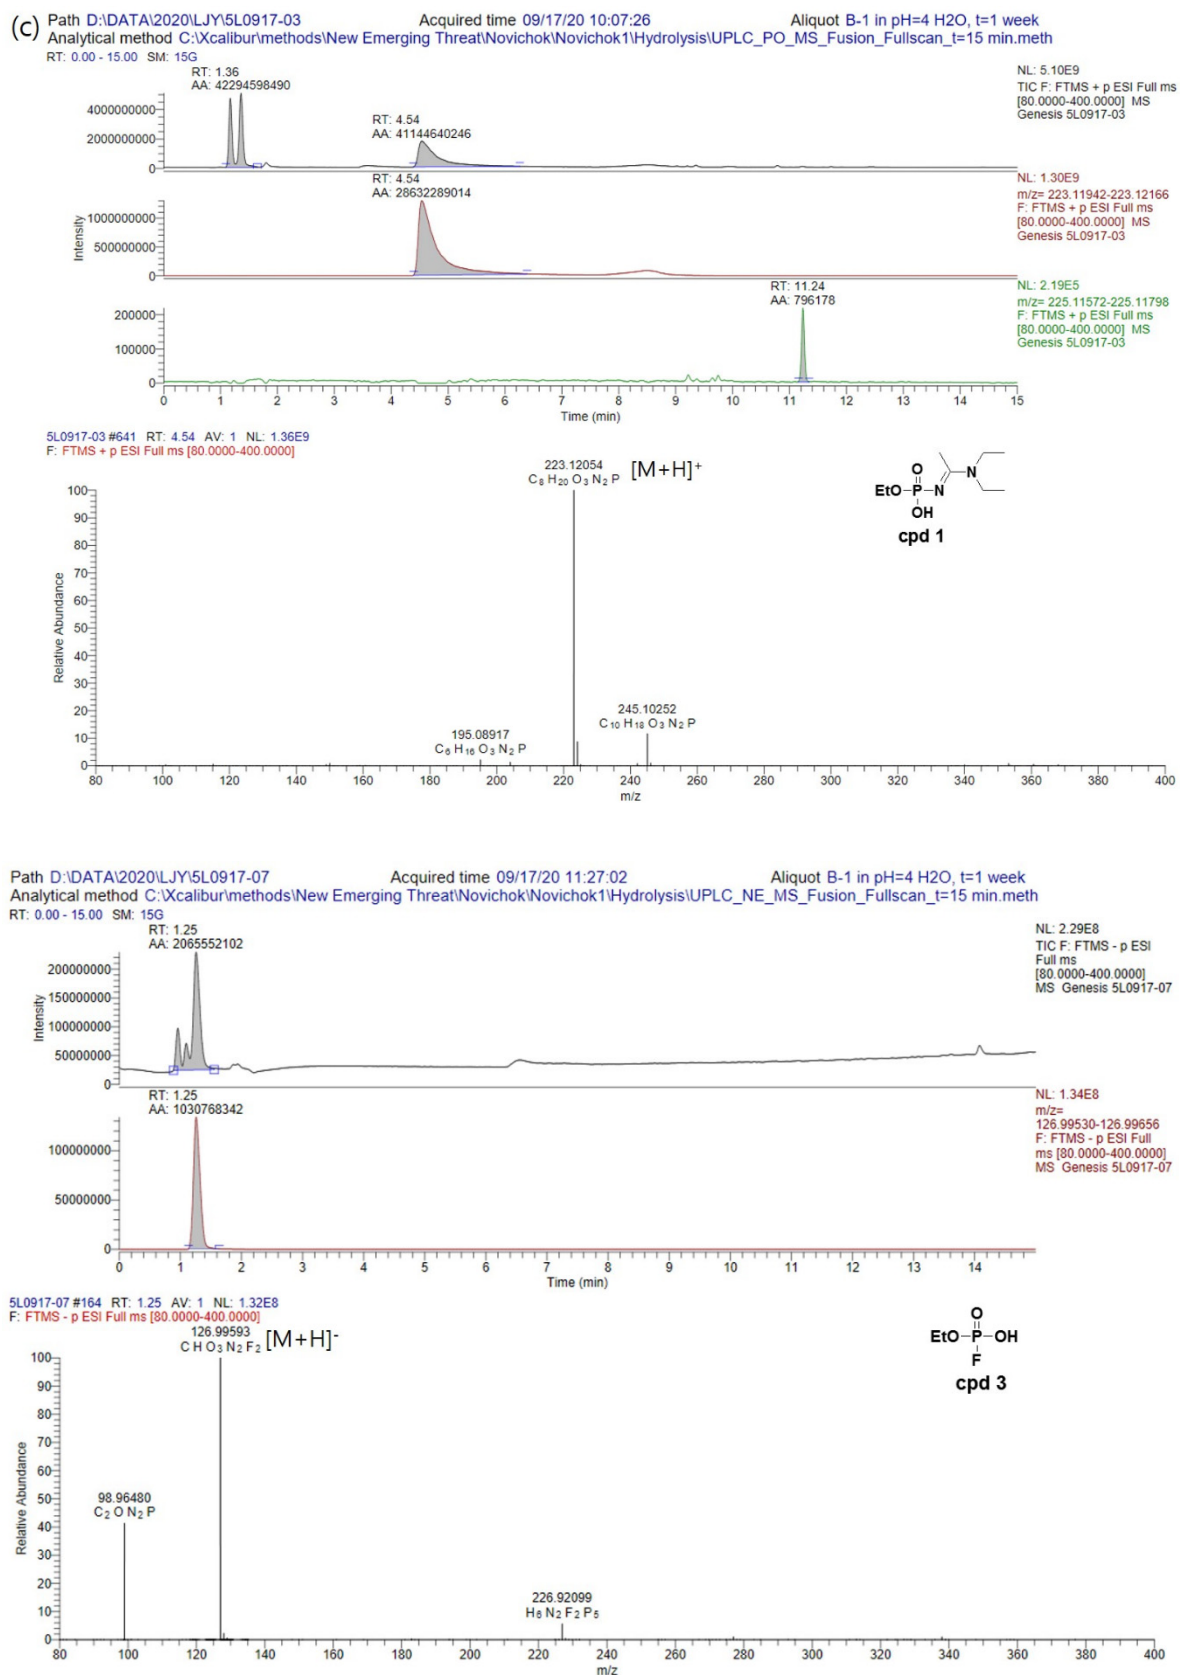

Supplemental figure 1. Time profile of A234 in an acidic aqueous solution for 1 week. (a) t = 0 h, (b) t = 4

days, (c) t = 1 week.

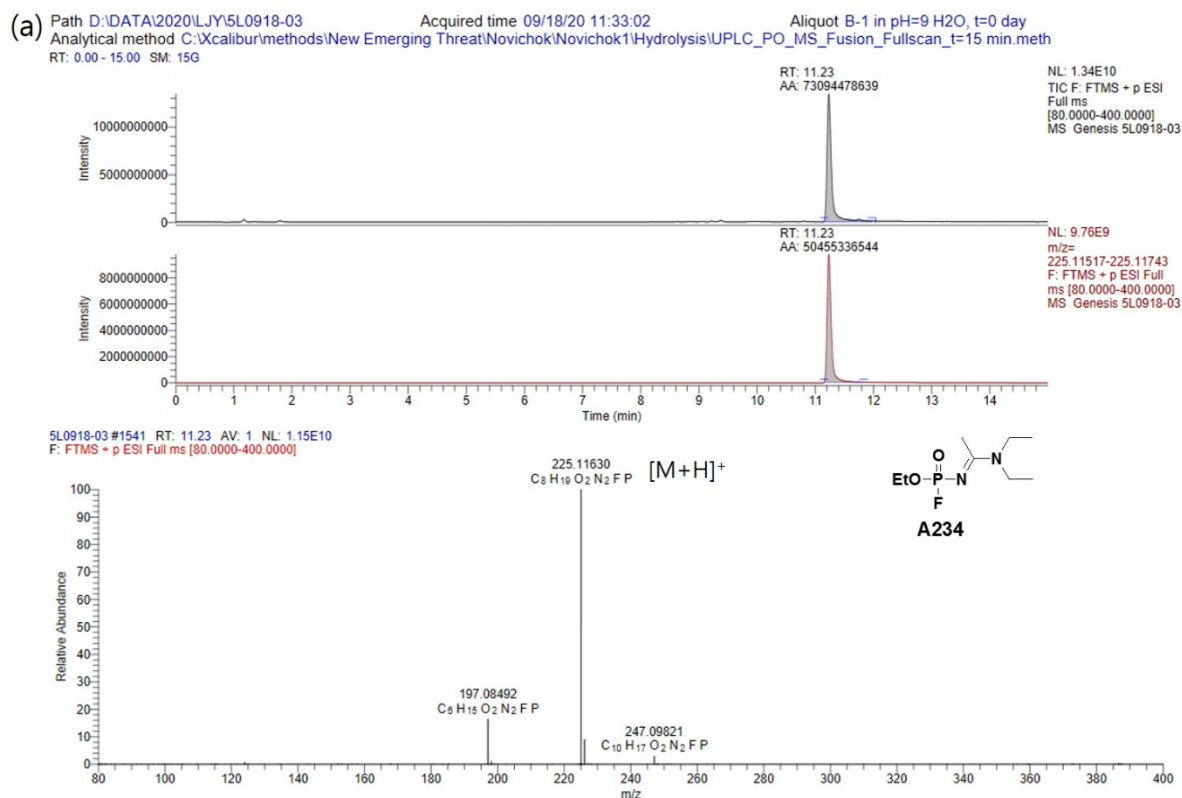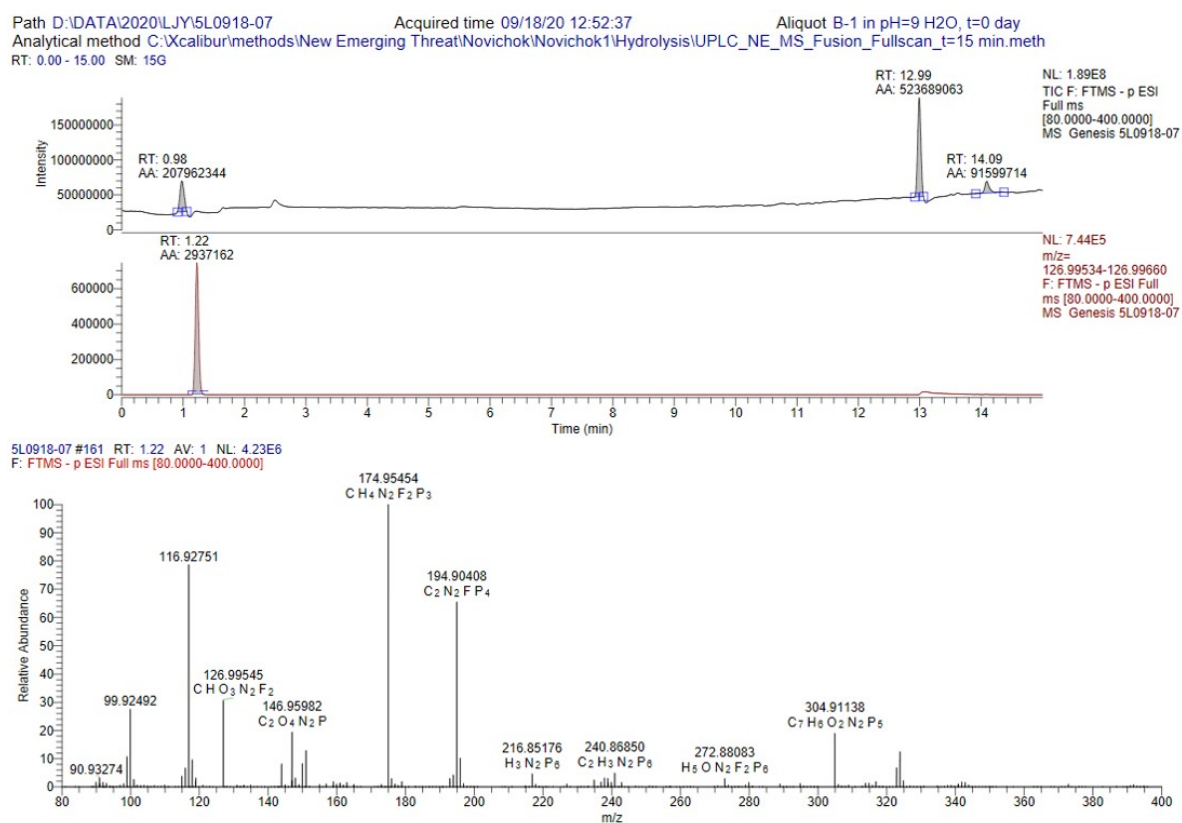

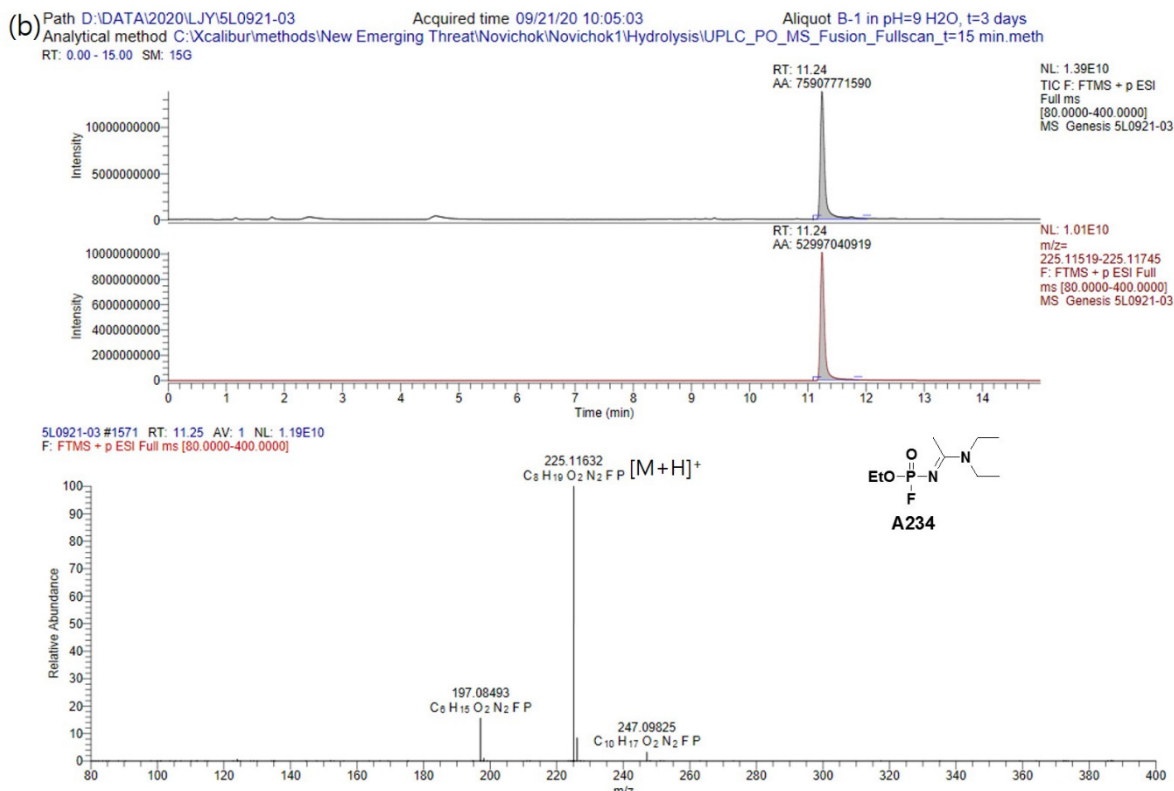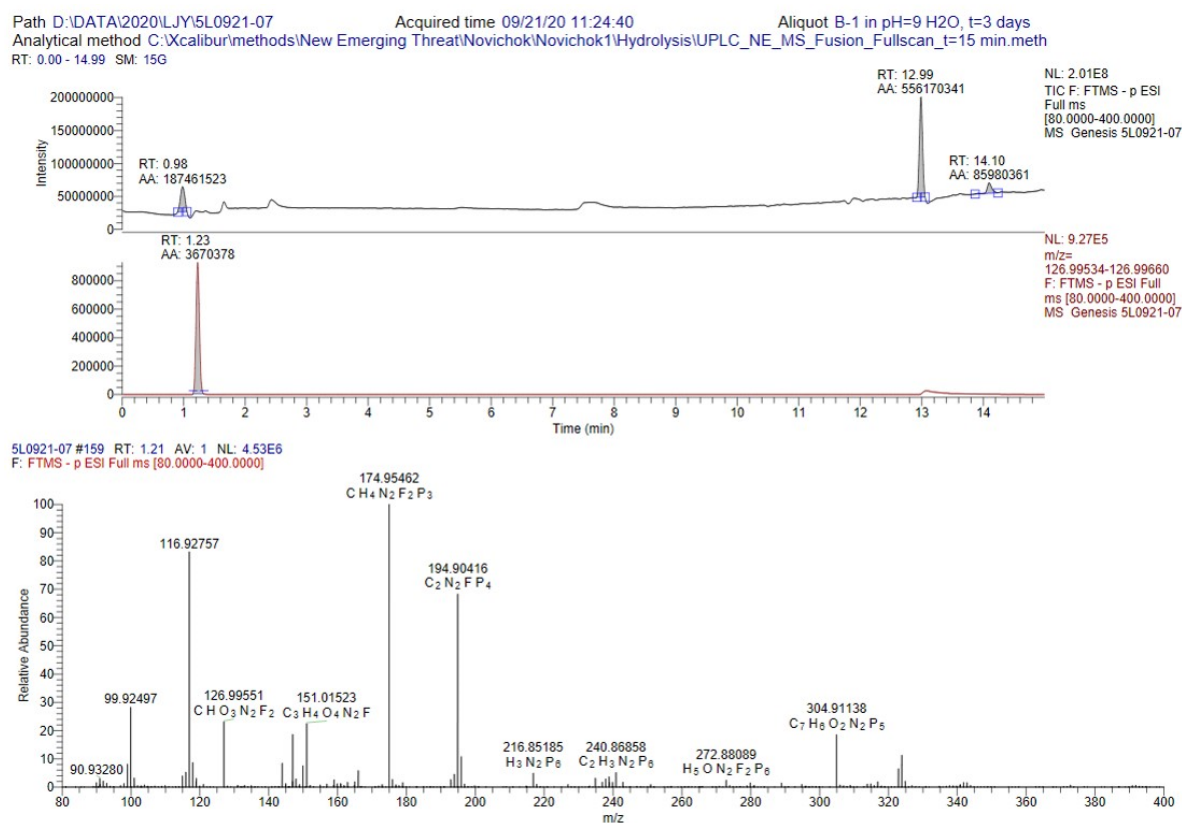

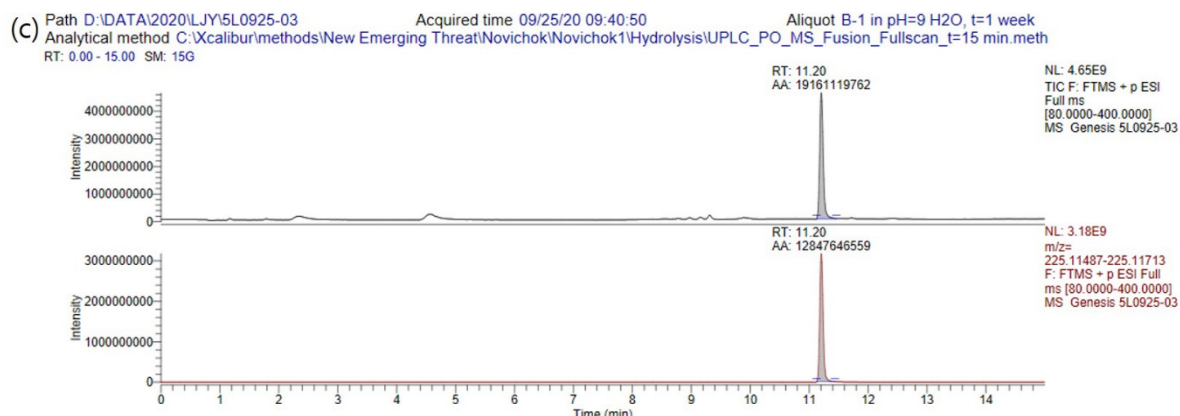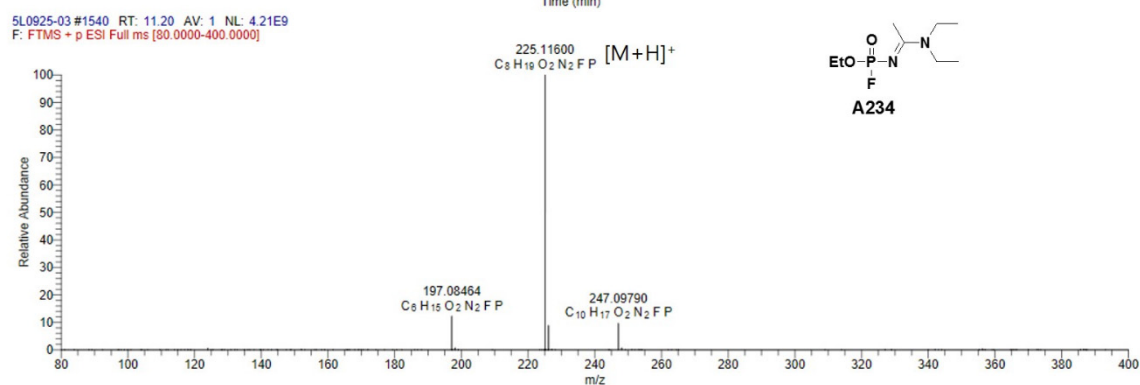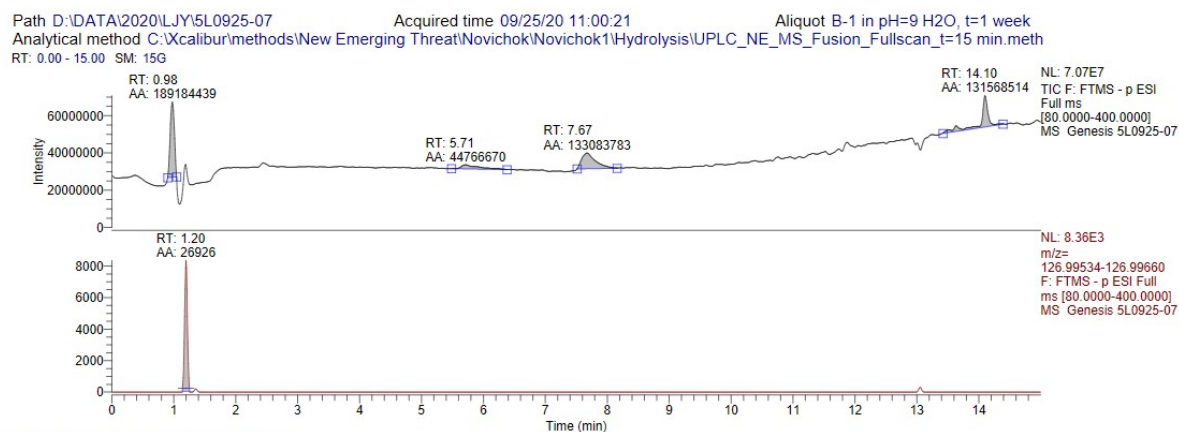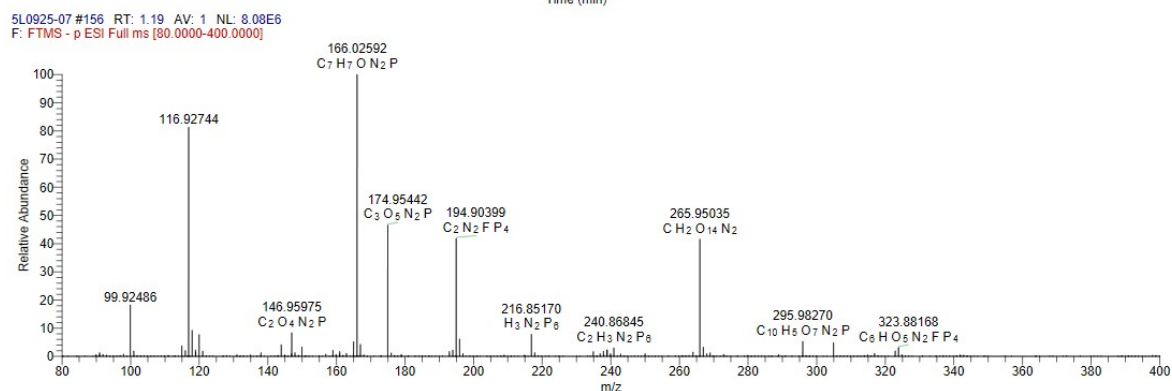

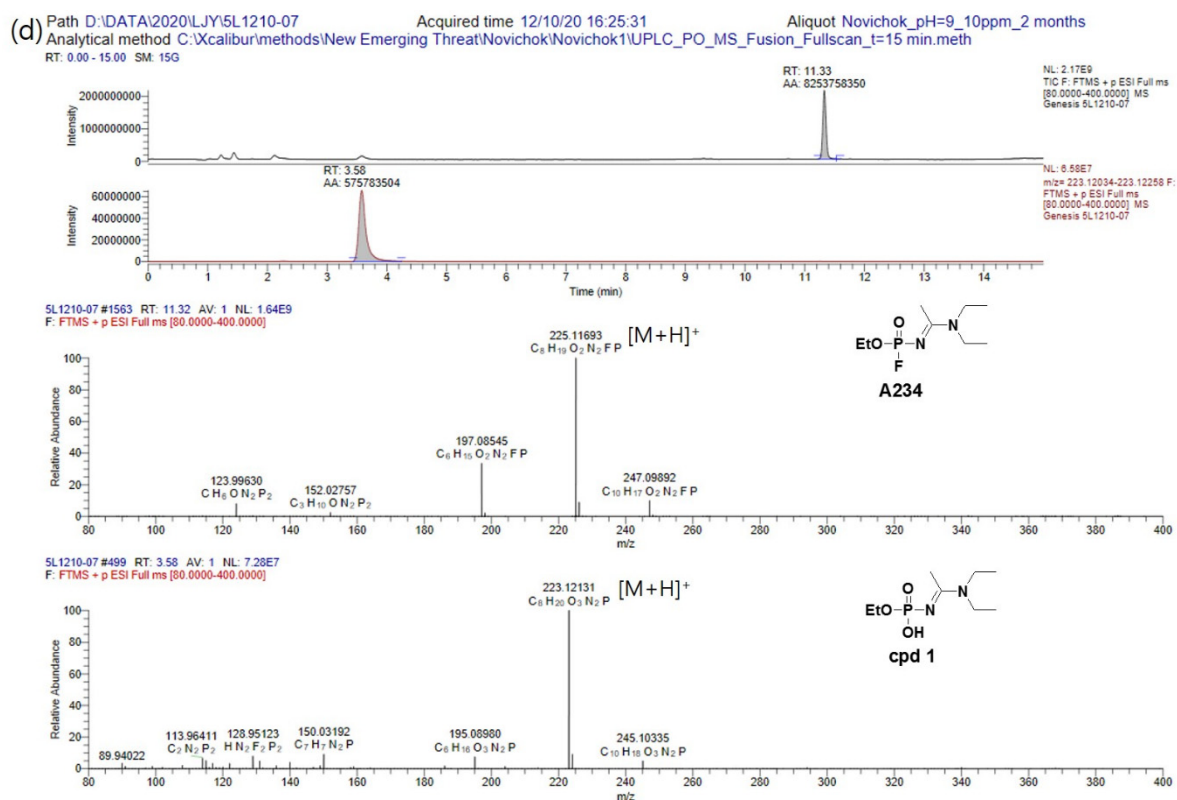

Supplemental figure 2. Time profile of A234 in a basic aqueous solution for 1 week. (a)  $t = 0$  h, (b)  $t = 3$  days, (c)  $t = 1$  week, (d)  $t = 2$  months.
